# Supplementary material for: Exploring molecular reorientations in amorphous and recrystallized felodipine at the microscopic level
Source: Royal Society of Chemistry journal article supplement (doi:10.1039/d0ra07266d), 2020-01-01
Supplement: d0ra07266d1.pdf [file d0ra07266d1.pdf]

## Supplementary Information

### Exploring Molecular Reorientations in Amorphous and Recrystallized Felodipine at the Microscopic Level

A.Pajzderska<sup>1\*</sup>, J. Jencyk<sup>2</sup>, J. P. Embs<sup>3</sup> J. Wąsicki<sup>1,2</sup>

<sup>1</sup> Faculty of Physics, Adam Mickiewicz University, Uniwersytetu Poznańskiego 2, 61-614 Poznań, Poland

<sup>2</sup> NanoBioMedical Centre, Adam Mickiewicz University, Wszechnicy Piastowskiej 3, 61-614 Poznań, Poland

<sup>3</sup> Laboratory for Neutron Scattering and Imaging, Paul Scherrer Institut, 5232 Villigen, Switzerland

\*corresponding author

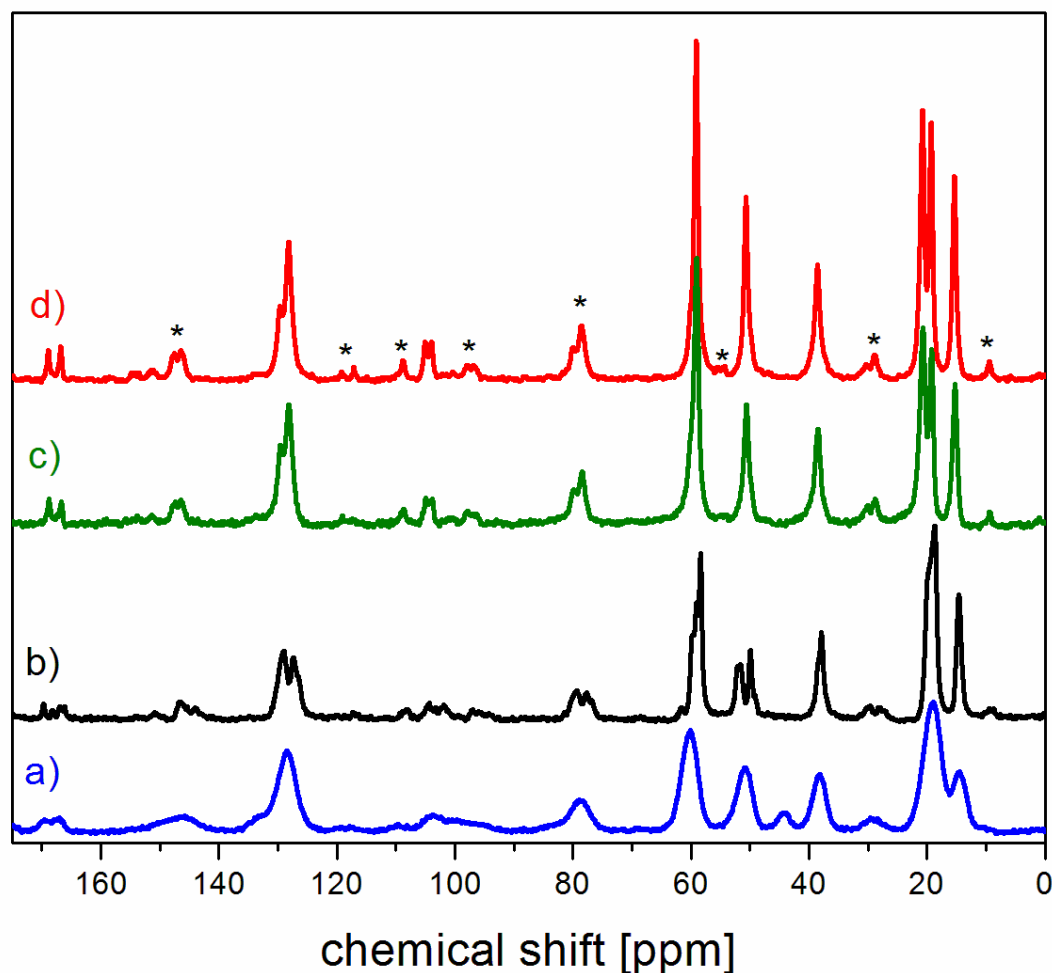

Fig. 1S. The <sup>13</sup>C CP MAS spectra of a) amorphous b) partially recrystallized c) fully recrystallized d) crystalline felodipine<sup>1</sup> The asterisks denote satellites.

## Reference

- 1 A. Pajzderska, K. Drużbicki, M. A. Gonzalez, J. Jencyk, J. Mielcarek, J. Wąsicki, Diversity of Methyl Group Dynamics in Felodipine: a DFT Supported NMR and Neutron Scattering Study, *Crystal Engineering Communications*, **2018**, 20, 7371-7385.
